# Supplementary material for: Neoadjuvant Metformin Added to Systemic Therapy Decreases the Proliferative Capacity of Residual Breast Cancer
Source: PubMed Central journal article supplement (PMC6947627; doi:10.3390/jcm8122180), 2019-12-11
Supplement: jcm-08-02180-s001.pdf [file jcm-08-02180-s001.pdf]

**Neoadjuvant metformin added to systemic therapy  
reduces the proliferative activity of breast cancer residual disease**

**SUPPLEMENTARY INFORMATION**

**Table S1. Association of the interaction between baseline Ki67 score and pCR by treatment arm**

|                  | Non-pCR (N, %) | pCR (%)     | OR (95% CI)       | p-value | OR (95% CI)       | p-value |
|------------------|----------------|-------------|-------------------|---------|-------------------|---------|
| <b>Ki67 VA</b>   |                |             |                   |         |                   |         |
| <20%             | 6 (66.67%)     | 3 (33.33%)  | 1                 |         | 1                 |         |
| ≥20%             | 23 (37.30%)    | 38 (62.30%) | 2.73 (0.39-18.88) | 0.309   | 3.36 (0.76-14.82) | 0.110   |
| <b>Arm</b>       |                |             |                   |         |                   |         |
| B                | 14 (38.89%)    | 22 (61.12%) | 1                 |         | 1                 |         |
| A                | 15 (44.12%)    | 19 (55.88%) | 0.50 (0.03-8.95)  | 0.638   | 0.78 (0.29-2.06)  | 0.613   |
| <b>Ki67*Arm</b>  |                |             | 1.65 (0.08-35.39) | 0.749   |                   |         |
| <b>Ki67 ADIA</b> |                |             |                   |         |                   |         |
| <20%             | 8 (72.73%)     | 3 (27.27%)  | 1                 |         | 1                 |         |
| ≥20%             | 21 (35.39%)    | 38 (64.41%) | 5.73 (0.53-61.75) | 0.150   | 4.76 (1.13-20.09) | 0.034   |
| <b>Arm</b>       |                |             |                   |         |                   |         |
| B                | 14 (38.89%)    | 22 (61.12%) | 1                 |         | 1                 |         |
| A                | 15 (44.12%)    | 19 (55.88%) | 1.20 (0.07-19.63) | 0.898   | 0.93 (0.34-2.51)  | 0.879   |
| <b>Ki67*Arm</b>  |                |             | 0.74 (0.04-14.79) | 0.845   |                   |         |

**Table S2. Association of the interaction between baseline Ki67 score and pCR in the metformin-containing arm A**

|                  | Non-pCR (N, %) | pCR (%)     | OR (95% CI)       | p-value |
|------------------|----------------|-------------|-------------------|---------|
| <b>Ki67 VA</b>   |                |             |                   |         |
| <20%             | 3 (75.00%)     | 1 (25.00%)  | 1                 |         |
| ≥20%             | 12 (40.00%)    | 18 (60.00%) | 4.50 (0.42-48.53) | 0.215   |
| <b>Ki67 ADIA</b> |                |             |                   |         |
| <20%             | 5 (71.43%)     | 2 (28.57%)  | 1                 |         |
| ≥20%             | 10 (37.04%)    | 17 (62.96%) | 4.25 (0.69-26.13) | 0.118   |

**Table S3. Association of the interaction between baseline Ki67 score and pCR in the control arm B**

|                  | Non-pCR (N, %) | pCR (%)     | OR (95% CI)       | p-value |
|------------------|----------------|-------------|-------------------|---------|
| <b>Ki67 VA</b>   |                |             |                   |         |
| <20%             | 3 (60.00%)     | 2 (40.00%)  | 1                 |         |
| ≥20%             | 11 (35.48%)    | 20 (64.52%) | 2.73 (0.39-18.88) | 0.309   |
| <b>Ki67 ADIA</b> |                |             |                   |         |
| <20%             | 3 (75.00%)     | 1 (25.00%)  | 1                 |         |
| ≥20%             | 11 (34.38%)    | 21 (65.63%) | 5.73 (0.53-61.75) | 0.150   |

**Table S4. Association of the interaction between baseline Ki67 score and pCR by treatment arm adjusted by HR status**

|                      | Non-pCR (N, %) | pCR (%)     | OR (95% CI)       | p-value | OR (95% CI)       | p-value |
|----------------------|----------------|-------------|-------------------|---------|-------------------|---------|
| <b>Ki67 VA</b>       |                |             |                   |         |                   |         |
| <20%                 | 6 (66.67%)     | 3 (33.33%)  | 1                 |         | 1                 |         |
| ≥20%                 | 23 (37.30%)    | 38 (62.30%) | 2.86 (0.40-20.25) | 0.293   | 3.25 (0.72-14.60) | 0.125   |
| <b>Arm</b>           |                |             |                   |         |                   |         |
| B                    | 14 (38.89%)    | 22 (61.12%) | 1                 |         | 1                 |         |
| A                    | 15 (44.12%)    | 19 (55.88%) | 0.54 (0.03-9.97)  | 0.680   | 0.71 (0.26-1.93)  | 0.503   |
| <b>Ki67*Arm</b>      |                |             |                   |         |                   |         |
|                      |                |             | 1.36 (0.06-30.51) | 0.845   |                   |         |
| <i>HR</i>            |                |             |                   |         |                   |         |
| <i>ER and/or PR+</i> | 19 (47.50%)    | 21 (52.50%) | 1                 |         | 1                 |         |
| <i>ER and PR-</i>    | 10 (27.78%)    | 20 (66.67%) | 1.81 (0.65-5.02)  | 0.253   | 1.83 (0.67-5.05)  | 0.242   |
| <b>Ki67 ADIA</b>     |                |             |                   |         |                   |         |
| <20%                 | 8 (72.73%)     | 3 (27.27%)  | 1                 |         | 1                 |         |
| ≥20%                 | 21 (35.39%)    | 38 (64.41%) | 6.98 (0.61-80.01) | 0.119   | 5.57 (1.26-24.74) | 0.024   |
| <b>Arm</b>           |                |             |                   |         |                   |         |
| B                    | 14 (38.89%)    | 22 (61.12%) | 1                 |         | 1                 |         |
| A                    | 15 (44.12%)    | 19 (55.88%) | 1.14 (0.07-19.96) | 0.929   | 0.83 (0.30-2.11)  | 0.723   |
| <b>Ki67*Arm</b>      |                |             |                   |         |                   |         |
|                      |                |             | 0.70 (0.03-14.56) | 0.815   |                   |         |
| <i>HR</i>            |                |             |                   |         |                   |         |
| <i>ER and/or PR+</i> | 19 (47.50%)    | 21 (52.50%) | 1                 |         | 1                 |         |
| <i>ER and PR-</i>    | 10 (33.33%)    | 20 (66.67%) | 2.28 (0.78-6.63)  | 0.131   | 2.21 (0.77-6.35)  | 0.140   |

**Table S5. Association of the interaction between baseline Ki67 score and pCR in the metformin-containing arm a adjusted by HR status**

|                      | Non-pCR (N, %) | pCR (%)     | OR (95% CI)       | p-value |
|----------------------|----------------|-------------|-------------------|---------|
| <b>Ki67 VA</b>       |                |             |                   |         |
| <20%                 | 3 (75.00%)     | 1 (25.00%)  | 1                 |         |
| ≥20%                 | 12 (40.00%)    | 18 (60.00%) | 3.90 (0.35-43.51) | 0.269   |
| <i>HR</i>            |                |             |                   |         |
| <i>ER and/or PR+</i> | 9 (52.94%)     | 8 (47.06%)  | 1                 |         |
| <i>ER and PR-</i>    | 6 (35.29%)     | 11 (64.71%) | 1.81 (0.03-7.46)  | 0.410   |
| <b>Ki67 ADIA</b>     |                |             |                   |         |
| <20%                 | 5 (71.43%)     | 2 (28.57%)  | 1                 |         |
| ≥20%                 | 10 (37.04%)    | 17 (62.96%) | 4.94 (0.75-32.62) | 0.097   |
| <i>HR</i>            |                |             |                   |         |
| <i>ER and/or PR+</i> | 11 (57.89%)    | 8 (42.11%)  | 1                 |         |
| <i>ER and PR-</i>    | 6 (31.58%)     | 13 (68.42%) | 2.45 (0.56-10.69) | 0.233   |

**Table S6. Association of the interaction between baseline Ki67 score and pCR in the control arm B adjusted by HR status**

|                      | Non-pCR (N, %) | pCR (%)     | OR (95% CI)       | p-value |
|----------------------|----------------|-------------|-------------------|---------|
| <b>Ki67 VA</b>       |                |             |                   |         |
| <20%                 | 3 (60.00%)     | 2 (40.00%)  | 1                 |         |
| ≥20%                 | 11 (35.48%)    | 20 (64.52%) | 2.86 (0.40-20.33) | 0.294   |
| <i>HR</i>            |                |             |                   |         |
| <i>ER and/or PR+</i> | 10 (43.48%)    | 13 (56.52%) | 1                 |         |
| <i>ER and PR-</i>    | 4 (30.77%)     | 9 (69.237%) | 1.81 (0.42-7.87)  | 0.428   |
| <b>Ki67 ADIA</b>     |                |             |                   |         |
| <20%                 | 3 (75.00%)     | 1 (25.00%)  | 1                 |         |
| ≥20%                 | 11 (34.38%)    | 21 (65.63%) | 6.80 (0.58-79.14) | 0.126   |
| <i>HR</i>            |                |             |                   |         |
| <i>ER and/or PR+</i> | 10 (41.67%)    | 14 (58.33%) | 1                 |         |
| <i>ER and PR-</i>    | 4 (23.53%)     | 13 (76.47%) | 2.10 (0.45-9.84)  | 0.347   |
